# Supplementary material
Source: PubMed Central journal article supplement (PMC6156177)
Supplement: supp_the2017-0502_onco12439-sup-0001-suppinfo01.pdf [file supp_the2017-0502_onco12439-sup-0001-suppinfo01.pdf]

Supplemental Figure for:  
Development and validation of a clinical score for cardiovascular risk stratification of long-term childhood cancer survivors  
Evangelos K. Oikonomou et al.

**Figure S1. Validation of the CHACS-CV score in a set of two independent SEER registries.** Similarly to the derivation set, long-term childhood cancer survivors in the validation set were stratified in three distinct risk groups (high risk if CHACS-CV $\geq$ 6; mid-risk if CHACS-CV=4-5 and low-risk if CHACS-CV $\leq$ 3) (A). Compared to the low-risk group, those in the high-risk group had a six-fold, while those in the mid-risk group almost a three-fold higher risk of cardiovascular mortality. At 25 years after the 5-year survival cut-off, cumulative incidence of cardiovascular mortality in the high-, mid- and low-risk groups was 4.7%, 3.1% and 0.8% respectively (P<sub>log-rank</sub><0.001) (B).

CHACS-CV: Childhood and Adolescence Cancer Survivor Cardiovascular risk score; CI: confidence interval; CV: Cardiovascular; HR: Hazard Ratio.

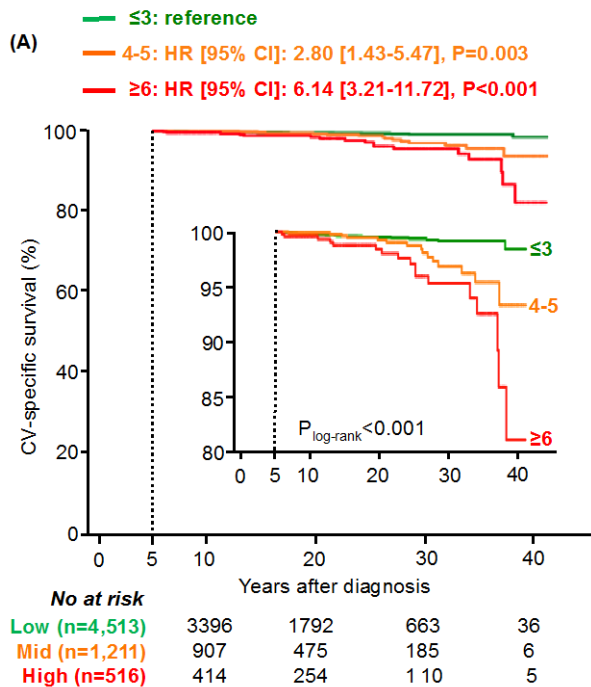

(B)

| Cumulative incidence of CV mortality among long-term childhood cancer survivors (survival $\geq$ 5 years) (%) [95% confidence interval] |                                                            |                  |                  |
|-----------------------------------------------------------------------------------------------------------------------------------------|------------------------------------------------------------|------------------|------------------|
| CHACS-CV                                                                                                                                | Time after diagnosis (5 year survival cut-off + follow-up) |                  |                  |
|                                                                                                                                         | 10 (5+5) years                                             | 20 (5+15) years  | 30 (5+25) years  |
| $\leq 3$                                                                                                                                | 0.2<br>[0.1-0.5]                                           | 0.5<br>[0.3-0.8] | 0.8<br>[0.5-1.4] |
| 4-5                                                                                                                                     | 0.1<br>[0.0-0.6]                                           | 0.9<br>[0.4-2.1] | 3.1<br>[1.7-5.7] |
| $\geq 6$                                                                                                                                | 0.4<br>[0.1-1.6]                                           | 2.0<br>[0.9-4.2] | 4.7<br>[2.6-8.4] |

CHACS-CV: Childhood and Adolescence Cancer Survivor Cardiovascular Risk score; CV: cardiovascular  
\*Cumulative incidence calculated by the Kaplan Meier method in the validation set.
